# Supplementary material for: Pathogenicity and escape to pre-existing immunity of a new genotype of swine influenza H1N2 virus that emerged in France in 2020
Source: Springer Nature journal article supplement (doi:10.1186/s13567-024-01319-5), 2024-05-21

**A**

| group     | pig  | D-3 | D1 | D2 | D3 | D4 | D7 | D8 | D9 | D10 |
|-----------|------|-----|----|----|----|----|----|----|----|-----|
| H1N1      | 8354 |     | ■  | ■  | ■  | ■  | ■  |    |    |     |
|           | 8366 |     | ■  | ■  | ■  | ■  | ■  |    |    |     |
|           | 8374 |     | ■  | ■  | ■  | ■  | ■  | ■  | ■  |     |
|           | 8388 |     | ■  | ■  | ■  | ■  | ■  | ■  |    |     |
|           | 8404 |     | ■  | ■  | ■  | ■  | ■  |    |    |     |
|           | 8406 |     | ■  | ■  | ■  | ■  | ■  |    |    |     |
| H1N2      | 8361 |     | ■  | ■  | ■  | ■  |    |    |    |     |
|           | 8364 |     | ■  | ■  | ■  | ■  |    |    |    |     |
|           | 8373 |     | ■  | ■  | ■  | ■  |    |    |    |     |
|           | 8384 |     | ■  | ■  | ■  | ■  |    |    |    |     |
|           | 8398 |     | ■  | ■  | ■  | ■  |    |    |    |     |
|           | 8407 |     | ■  | ■  | ■  | ■  |    |    |    |     |
| H1N1 VACC | 8358 |     |    |    |    | ■  |    |    |    |     |
|           | 8376 |     |    |    |    |    |    |    |    |     |
|           | 8378 |     |    |    |    |    |    |    |    |     |
|           | 8390 |     |    |    |    |    |    |    |    |     |
|           | 8399 |     |    |    |    |    |    |    |    |     |
|           | 8409 |     |    |    |    |    |    |    |    |     |
| H1N2 VACC | 8357 |     | ■  | ■  | ■  | ■  |    |    |    |     |
|           | 8367 |     | ■  | ■  | ■  | ■  |    |    |    |     |
|           | 8371 |     | ■  | ■  | ■  | ■  |    |    |    |     |
|           | 8389 |     | ■  | ■  | ■  | ■  | ■  | ■  | ■  | ■   |
|           | 8400 |     | ■  | ■  | ■  | ■  | ■  | ■  | ■  | ■   |
|           | 8403 |     | ■  | ■  | ■  | ■  | ■  |    |    |     |

**B**

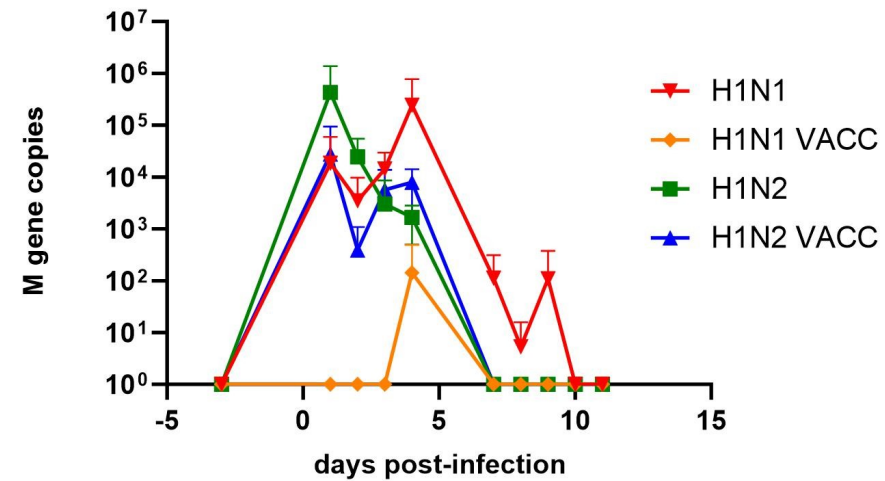

**C**

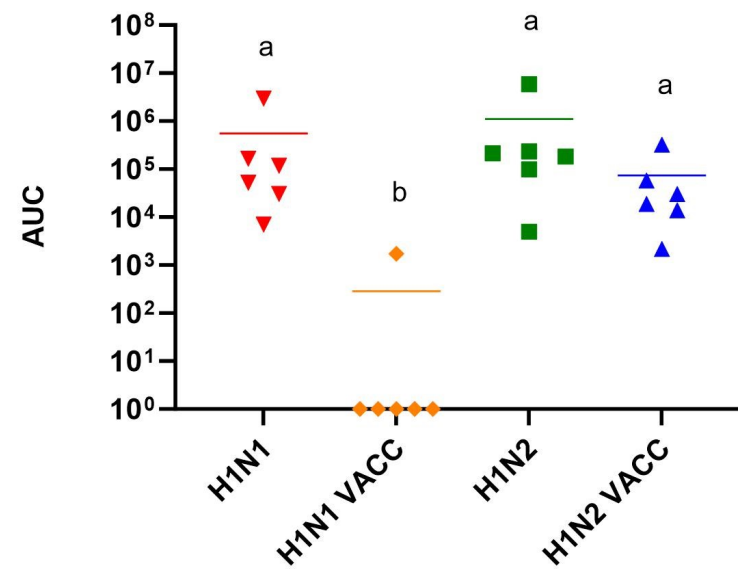

Supplement: MOESM1 [file 13567_2024_1319_MOESM1_ESM.pdf]
